# Supplementary material for: Using positive deviance to improve timely access in primary care
Source: HighWire-hosted journal article supplement (doi:10.1136/bmjoq-2020-001228), 2021-10-01
Supplement: bmjoq-2020-001228supp001_data_supplement.pdf [file bmjoq-2020-001228supp001_data_supplement.pdf]

# **Appendix 1: Survey used to understand staff physician practice patterns and views on timely access**

---

Start of Block: Default Question Block

Q3 When thinking about managing your schedule, how often do you use the following strategies to optimize access:

|                                                                                                                    | Never (1)             | Rarely (2)            | Sometimes (3)         | Often (4)             | Always (5)            |
|--------------------------------------------------------------------------------------------------------------------|-----------------------|-----------------------|-----------------------|-----------------------|-----------------------|
| I adjust my clinic schedule based on my TNA (1)                                                                    | <input type="radio"/> |
| I start my morning clinics before 9am (2)                                                                          | <input type="radio"/> |
| I book administrative slots at the start of my clinic to help accommodate urgent patient issues that may arise (3) | <input type="radio"/> |
| I schedule my clinic half-days so they are spread out through the week (4)                                         | <input type="radio"/> |
| I adjust the number of pink slots (same/next day slots) I have per day based on patient demand (5)                 | <input type="radio"/> |
| I educate my patients on my pink slots (same/next day slots) (6)                                                   | <input type="radio"/> |

Q13 In order to optimize access, do you sometimes review your appointment schedule in advance?

- Yes (1)
- No (2)

*Skip To: Q10 If In order to optimize access, do you sometimes review your appointment schedule in advance? = No*

---

Q14 When thinking about reviewing your appointment schedule in advance, how often do you do each of the following:

|                                                                                              | Never (1)             | Rarely (2)            | Sometimes (3)         | Often (4)             | Always (5)            |
|----------------------------------------------------------------------------------------------|-----------------------|-----------------------|-----------------------|-----------------------|-----------------------|
| Ensure that patients booked are part of my roster (1)                                        | <input type="radio"/> |
| Ensure that patients are not booked with more than 1 appointment (2)                         | <input type="radio"/> |
| Allow for an opportunity to call/email a patient to mitigate a visit (3)                     | <input type="radio"/> |
| See whether test results have come in which are necessary to review at an upcoming visit (4) | <input type="radio"/> |
| Ensure that patient doesn't need to be seen sooner for an urgent issue (5)                   | <input type="radio"/> |
| Ensure that a longer appointment isn't required for a complex patient (6)                    | <input type="radio"/> |

Q10 When thinking about your day-to-day practice, how often do you use the following strategies?

|                                                                                                             | Never (1)             | Rarely (2)            | Sometimes (3)         | Often (4)             | Always (5)            |
|-------------------------------------------------------------------------------------------------------------|-----------------------|-----------------------|-----------------------|-----------------------|-----------------------|
| I use fax prescriptions renewals (1)                                                                        | <input type="radio"/> |
| I deal with multiple problems in one visit if the patients brings them up (2)                               | <input type="radio"/> |
| I proactively address multiple patient issues in a single visit to avoid another patient visit (3)          | <input type="radio"/> |
| I proactively bring up preventive health manoeuvres even when a patient is coming in for something else (4) | <input type="radio"/> |

Q16 When thinking about communicating with patients outside of clinic, how often do you use the following strategies:

|                                                                                                                                     | Never (1)             | Rarely (2)            | Sometimes (3)         | Often (4)             | Always (5)            |
|-------------------------------------------------------------------------------------------------------------------------------------|-----------------------|-----------------------|-----------------------|-----------------------|-----------------------|
| I communicate with patients via email or secure messaging for clinical issues (1)                                                   | <input type="radio"/> |
| I communicate with patients via email or secure messaging for administrative issues (eg. appointment booking, forms, referrals) (2) | <input type="radio"/> |
| I integrate phone appointments with patients into my regular clinic (3)                                                             | <input type="radio"/> |
| I communicate test results with patients using email, secure messaging, phone, or mailed letter (4)                                 | <input type="radio"/> |

Q8 When thinking about managing complex patients, how often do you use the following strategies:

|                                                                                  | Never (1)             | Rarely (2)            | Sometimes (3)         | Often (4)             | Always (5)            |
|----------------------------------------------------------------------------------|-----------------------|-----------------------|-----------------------|-----------------------|-----------------------|
| Booking longer appointments (1)                                                  | <input type="radio"/> |
| Adjusting the time between follow-up appointments based on disease stability (2) | <input type="radio"/> |
| Booking the next appointment before the patient leaves clinic (3)                | <input type="radio"/> |

---

Q9 When thinking about planning and taking vacation, how often do you use the following strategies:

|                                                                                                                                                                 | Never (1)             | Rarely (2)            | Sometimes (3)         | Often (4)             | Always (5)            |
|-----------------------------------------------------------------------------------------------------------------------------------------------------------------|-----------------------|-----------------------|-----------------------|-----------------------|-----------------------|
| I inform my patients of upcoming absence (1)                                                                                                                    | <input type="radio"/> |
| I try and book fewer routine follow-ups in the weeks following my vacation (eg. preventive health exams, well baby checks, chronic disease follow-up, etc.) (2) | <input type="radio"/> |
| I try to avoid taking vacation during typically busy periods (3)                                                                                                | <input type="radio"/> |
| I use post-vacation blocking (ie. strategically block off clinics following my vacation and re-open them during my absence) (4)                                 | <input type="radio"/> |



Q7 How often do you use our non-physician team members to help you with:

|                                   | Never (1)             | Rarely (2)            | Sometimes (3)         | Often (4)             | Always (5)            |
|-----------------------------------|-----------------------|-----------------------|-----------------------|-----------------------|-----------------------|
| Well baby checks (1)              | <input type="radio"/> |
| Immunizations (2)                 | <input type="radio"/> |
| Hypertension follow-up (3)        | <input type="radio"/> |
| Cancer screening (4)              | <input type="radio"/> |
| Reminder calls (5)                | <input type="radio"/> |
| Communication of test results (6) | <input type="radio"/> |
| Preventive health exams (7)       | <input type="radio"/> |

---

Q11 Please indicate how much you agree or disagree with the following statements.

|                                                                           | Strongly Disagree (1) | Disagree (2)          | Neither (3)           | Agree (4)             | Strongly Agree (5)    |
|---------------------------------------------------------------------------|-----------------------|-----------------------|-----------------------|-----------------------|-----------------------|
| I value providing timely access to patients (1)                           | <input type="radio"/> |
| I value continuity in my practice (2)                                     | <input type="radio"/> |
| I think TNA is a good measure of timely access to booked appointments (3) | <input type="radio"/> |
| I find TNA helps me improve my access for patients (4)                    | <input type="radio"/> |

Q17 What specific strategies do you think are most important to providing accessibility and continuity within your practice?

---

Q18 What could be done to help support you in providing quality care, accessibility, and continuity to your patients?

---

End of Block: Default Question Block
